# Supplementary material
Source: PubMed Central journal article supplement (PMC4151359)
Supplement: chest_146_3_573_ds01.pdf [file chest_146_3_573_ds01.pdf]

## Variation in Decisions to Forgo Life-Sustaining Therapies in US ICUs

Caroline M. Quill, MD; Sarah J. Ratcliffe, PhD; Michael O. Harhay, MPH; and Scott D. Halpern, MD, PhD

CHEST 2014; 146(3):573-582

**e-Figure 1.**

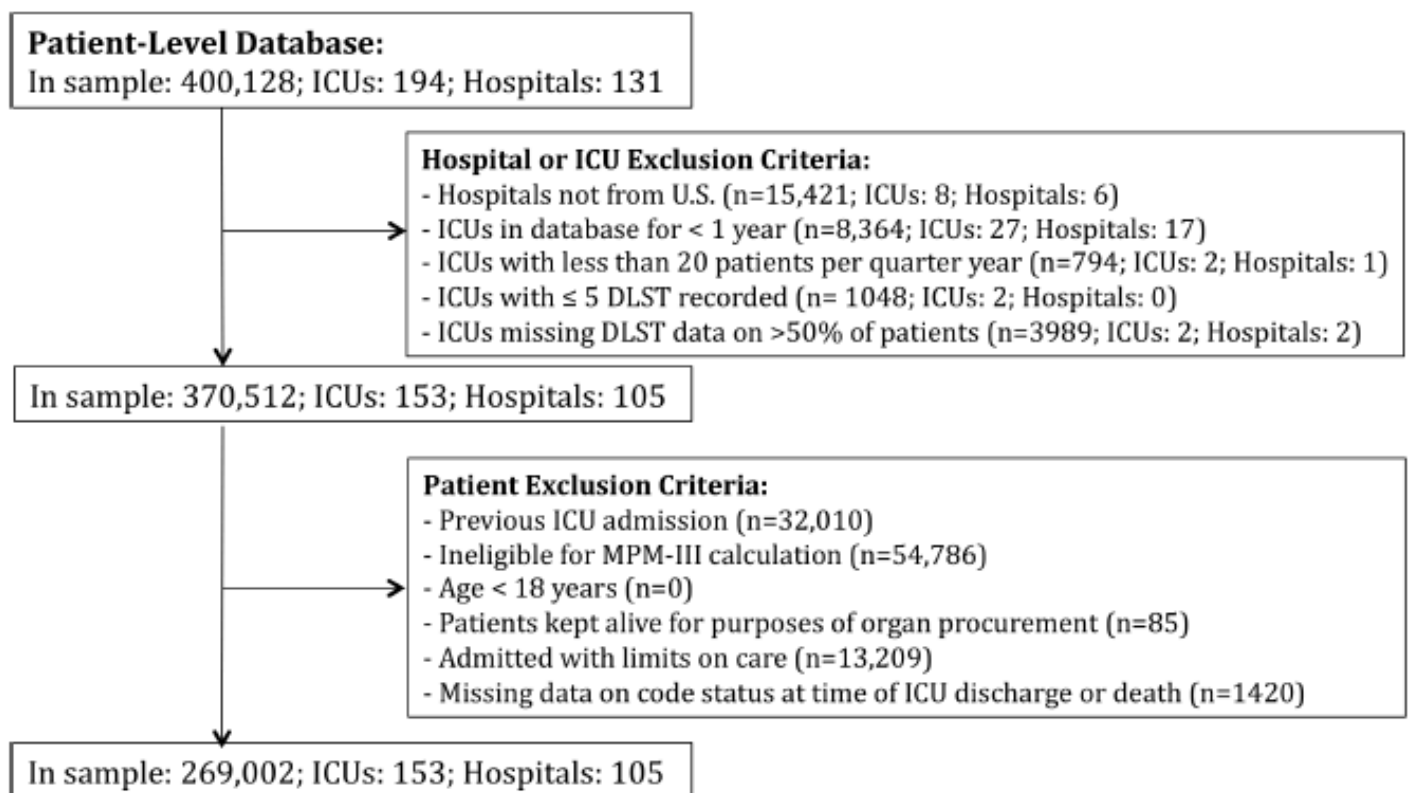

*Online supplements are not copyedited prior to posting.*

**e-Table 1:** Bivariate analysis

| Patient Characteristics at the Time of First ICU Admission | Bivariable Models |      |                          | p value |
|------------------------------------------------------------|-------------------|------|--------------------------|---------|
|                                                            | Total number (n)  | %    | % DFLST at ICU discharge |         |
| Number of patients, n                                      | 269,002           |      | 11.7                     |         |
| Age                                                        |                   |      |                          |         |
| <65                                                        | 151,965           | 56.5 | 7.6                      | -       |
| 65-74                                                      | 52,650            | 19.6 | 12.7                     | ***     |
| 75-84                                                      | 48,461            | 18.0 | 18.2                     | ***     |
| >84                                                        | 15,926            | 5.9  | 27.2                     | ***     |
| Race/ethnicity, %                                          |                   |      |                          |         |
| White                                                      | 205,925           | 76.5 | 12.2                     | -       |
| Black                                                      | 39,184            | 14.6 | 10.0                     | ***     |
| Other                                                      | 16,080            | 6.0  | 10.1                     | ***     |
| Sex                                                        |                   |      |                          |         |
| Male                                                       | 146,316           | 54.4 | 11.0                     | -       |
| Female                                                     | 122,627           | 45.6 | 12.4                     | ***     |
| Functional status on admission                             |                   |      |                          |         |
| Independent                                                | 211,204           | 78.5 | 8.7                      | -       |
| Partially dependent                                        | 40,210            | 14.9 | 20.4                     | ***     |
| Fully dependent                                            | 16,032            | 6.0  | 27.6                     | ***     |
| Insurance                                                  |                   |      |                          |         |
| Private                                                    | 80,707            | 30.0 | 7.5                      | -       |
| Medicare                                                   | 129,243           | 48.0 | 15.7                     | ***     |
| Medicaid                                                   | 23,383            | 8.7  | 9.0                      | ***     |
| Self-pay                                                   | 24,539            | 9.1  | 8.5                      | ***     |
| Other                                                      | 8,289             | 3.1  | 7.9                      | 0.168   |
| Source of ICU admission                                    |                   |      |                          |         |
| Emergency department                                       | 110,336           | 41.0 | 12.3                     | -       |
| Direct admission                                           | 16,763            | 6.2  | 15.0                     | ***     |
| General care floor                                         | 33,284            | 12.4 | 20.8                     | ***     |
| Step-down unit                                             | 7,730             | 2.9  | 22.8                     | ***     |
| Procedure                                                  | 89,127            | 33.1 | 5.4                      | ***     |
| SNF, rehab, LTACH                                          | 1,607             | 0.6  | 21.0                     | ***     |
| Another ICU                                                | 4,689             | 1.7  | 19.1                     | ***     |
| Other                                                      | 5,407             | 2.0  | 9.5                      | ***     |
| Patient type                                               |                   |      |                          |         |
| Elective surgery                                           | 59,544            | 22.1 | 3.1                      | -       |
| Emergency surgery                                          | 33,440            | 12.4 | 10.6                     | ***     |
| Medical                                                    | 176,017           | 65.4 | 14.8                     | ***     |

\*\*\* p-value <0.001

*Online supplements are not copyedited prior to posting.*

**e-Table 2:** Comorbid Conditions Included in Final Model

|                                             |
|---------------------------------------------|
| Cardiovascular disease                      |
| Gastrointestinal disease                    |
| Chronic hemodialysis or peritoneal dialysis |
| Chronic immunosuppression                   |
| HIV                                         |
| Lymphoma, leukemia, or myeloma              |
| Cancer with proven metastasis               |
| Baseline creatinine > 2mg/dl                |
| Hematogenous cancer within the last 5 years |
| Chronic lymphoma                            |
| Solid organ tumor within the last 5 years   |

*Online supplements are not copyedited prior to posting.*

**e-Table 3:** Sensitivity Analysis

| Patient Characteristics at the Time of First ICU Admission | Full model, only patients with DFLST data recorded | All missing coded as negative outcome | All missing coded as positive outcome |
|------------------------------------------------------------|----------------------------------------------------|---------------------------------------|---------------------------------------|
|                                                            | OR (95% CI)                                        | OR (95% CI)                           | OR (95% CI)                           |
| <b>Age</b>                                                 |                                                    |                                       |                                       |
| <65                                                        | reference                                          | reference                             | reference                             |
| 65-74                                                      | 1.50 (1.43 – 1.58)                                 | 1.50 (1.43 – 1.59)                    | 1.46 (1.39 – 1.53)                    |
| 75-84                                                      | 2.18 (2.07 – 2.30)                                 | 2.16 (2.06 – 2.27)                    | 2.05 (1.96 – 2.15)                    |
| >84                                                        | 3.44 (3.23 – 3.67)                                 | 3.36 (3.16 – 3.57)                    | 3.14 (2.96 – 3.33)                    |
| <b>Race/ethnicity, %</b>                                   |                                                    |                                       |                                       |
| White                                                      | reference                                          | -                                     | reference                             |
| Black                                                      | 0.73 (0.70 – 0.77)                                 | 0.70 (0.67 – 0.73)                    | 0.69 (0.66 – 0.72)                    |
| Other                                                      | 0.79 (0.74 – 0.85)                                 | 0.74 (0.69 – 0.79)                    | 0.73 (0.68 – 0.78)                    |
| <b>Sex</b>                                                 |                                                    |                                       |                                       |
| Male                                                       | reference                                          | -                                     | reference                             |
| Female                                                     | 1.09 (1.05 – 1.12)                                 | 1.08 (1.05 – 1.12)                    | 1.08 (1.05 – 1.11)                    |
| <b>Functional status on admission</b>                      |                                                    |                                       |                                       |
| Independent                                                | reference                                          | -                                     | reference                             |
| Partially dependent                                        | 1.78 (1.71 – 1.85)                                 | 1.73 (1.67 – 1.79)                    | 1.68 (1.62 – 1.74)                    |
| Fully dependent                                            | 2.29 (2.16 – 2.42)                                 | 2.12 (2.02 – 2.22)                    | 2.06 (1.96 – 2.16)                    |
| <b>Insurance</b>                                           |                                                    |                                       |                                       |
| Private                                                    | reference                                          | -                                     | reference                             |
| Medicare                                                   | 1.12 (1.07 – 1.17)                                 | 1.12 (1.07 – 1.18)                    | 1.12 (1.07 – 1.17)                    |
| Medicaid                                                   | 1.03 (0.96 – 1.10)                                 | 1.03 (0.97 – 1.10)                    | 1.02 (0.96 – 1.08)                    |
| Self-pay                                                   | 1.15 (1.08 – 1.22)                                 | 1.17 (1.09 – 1.24)                    | 1.14 (1.07 – 1.21)                    |
| Other                                                      | 1.04 (0.94 – 1.15)                                 | 1.01 (0.91 – 1.11)                    | 1.00 (0.91 – 1.11)                    |
| <b>Source of ICU admission</b>                             |                                                    |                                       |                                       |
| Emergency department                                       | reference                                          | -                                     | reference                             |
| Direct admission                                           | 1.06 (1.00 – 1.13)                                 | 1.05 (0.99 – 1.11)                    | 1.02 (0.96 – 1.08)                    |
| General care floor                                         | 1.56 (1.49 – 1.64)                                 | 1.52 (1.46 – 1.59)                    | 1.50 (1.44 – 1.56)                    |
| Step-down unit                                             | 1.45 (1.34 – 1.56)                                 | 1.43 (1.33 – 1.54)                    | 1.39 (1.30 – 1.49)                    |
| Procedure                                                  | 0.76 (0.70 – 0.81)                                 | 0.75 (0.70 – 0.80)                    | 0.73 (0.69 – 0.78)                    |
| SNF, rehab, LTACH                                          | 0.77 (0.65 – 0.91)                                 | 0.78 (0.70 – 0.91)                    | 0.78 (0.67 – 0.91)                    |
| Another ICU                                                | 1.12 (1.01 – 1.24)                                 | 1.05 (0.95 – 1.15)                    | 1.02 (0.93 – 1.12)                    |
| Other                                                      | 0.77 (0.68 – 0.87)                                 | 0.78 (0.70 – 0.87)                    | 0.79 (0.71 – 0.88)                    |
| <b>Patient type</b>                                        |                                                    |                                       |                                       |
| Elective surgery                                           | reference                                          | -                                     | reference                             |
| Emergency surgery                                          | 1.58 (1.47 – 1.70)                                 | 1.56 (1.45 – 1.67)                    | 1.52 (1.42 – 1.63)                    |
| Medical                                                    | 2.09 (1.93 – 2.27)                                 | 2.18 (2.01 – 2.36)                    | 2.07 (1.97 – 2.11)                    |

*Online supplements are not copyedited prior to posting.*

**e-Table 4:** Multivariate analysis stratified by survivor status

| Patient Characteristics at the Time of First ICU Admission | Died in ICU <sup>#</sup> |         | Survived to ICU Discharge <sup>+</sup> |         |
|------------------------------------------------------------|--------------------------|---------|----------------------------------------|---------|
|                                                            | OR (95% CI)              | p-value | OR (95% CI)                            | p-value |
| Number of patients, n                                      | 21,758 (8.1%)            |         | 247,244 (91.9%)                        |         |
| Age                                                        |                          |         |                                        |         |
| <65                                                        | reference                | -       | reference                              | -       |
| 65-74                                                      | 1.24 (1.09 - 1.41)       | ***     | 1.74 (1.04 - 1.23)                     | ***     |
| 75-84                                                      | 1.62 (1.41 - 1.86)       | ***     | 2.71 (2.25 - 2.91)                     | ***     |
| >84                                                        | 2.11 (1.75 - 2.54)       | ***     | 4.56 (4.20 - 4.95)                     | ***     |
| Race/ethnicity, %                                          |                          |         |                                        |         |
| White                                                      | reference                | -       | reference                              | -       |
| Black                                                      | 0.55 (0.49 - 0.61)       | ***     | 0.72 (0.67 - 0.77)                     | ***     |
| Other                                                      | 0.78 (0.66 - 0.93)       | 0.006   | 0.72 (0.64 - 0.80)                     | ***     |
| Sex                                                        |                          |         |                                        |         |
| Male                                                       | reference                | -       | reference                              | -       |
| Female                                                     | 1.25 (1.15 - 1.36)       | ***     | 1.09 (1.04 - 1.13)                     | ***     |
| Functional status on admission                             |                          |         |                                        |         |
| Independent                                                | reference                | -       | reference                              | -       |
| Partially dependent                                        | 1.25 (1.12 - 1.39)       | ***     | 2.12 (2.02 - 2.23)                     | ***     |
| Fully dependent                                            | 1.38 (1.19 - 1.61)       | ***     | 3.15 (2.94 - 3.36)                     | ***     |
| Insurance                                                  |                          |         |                                        |         |
| Private                                                    | reference                | -       | reference                              | -       |
| Medicare                                                   | 1.09 (0.95 - 1.23)       | 0.21    | 1.24 (1.15 - 1.33)                     | ***     |
| Medicaid                                                   | 1.11 (0.94 - 1.30)       | 0.21    | 1.09 (0.99 - 1.20)                     | 0.08    |
| Self-pay                                                   | 1.06 (0.90 - 1.24)       | 0.51    | 0.95 (0.84 - 1.06)                     | 0.35    |
| Other                                                      | 1.15 (0.90 - 1.49)       | 0.27    | 1.04 (0.88 - 1.22)                     | 0.68    |
| Source of ICU admission                                    |                          |         |                                        |         |
| Emergency department                                       | reference                | -       | reference                              | -       |
| Direct admission                                           | 1.07 (0.89 - 1.29)       | 0.46    | 1.03 (0.95 - 1.12)                     | 0.47    |
| General care floor                                         | 0.94 (0.84 - 1.05)       | 0.25    | 1.37 (1.29 - 1.45)                     | ***     |
| Step-down unit                                             | 0.94 (0.79 - 1.13)       | 0.52    | 1.39 (1.26 - 1.54)                     | ***     |
| Procedure                                                  | 0.78 (0.64 - 0.94)       | 0.008   | 0.74 (0.67 - 0.82)                     | ***     |
| SNF, rehab, LTACH                                          | 0.54 (0.37 - 0.79)       | 0.002   | 0.77 (0.63 - 0.93)                     | 0.007   |
| Another ICU                                                | 0.88 (0.69 - 1.11)       | 0.28    | 0.91 (0.78 - 1.07)                     | 0.26    |
| Other                                                      | 1.06 (0.76 - 1.48)       | 0.72    | 0.72 (0.61 - 0.85)                     | ***     |
| Patient type                                               |                          |         |                                        |         |
| Elective surgery                                           | reference                | -       | reference                              | -       |
| Emergency surgery                                          | 1.26 (1.02 - 1.54)       | 0.03    | 1.75 (1.56 - 1.96)                     | ***     |
| Medical                                                    | 1.06 (0.86 - 1.29)       | 0.60    | 2.48 (2.21 - 2.79)                     | ***     |

<sup>#</sup>pseudo  $r^2 = 0.10$  | AUROC = 0.72

<sup>+</sup>pseudo  $r^2 = 0.24$  | AUROC = 0.86

\*\*\*p<0.001

*Online supplements are not copyedited prior to posting.*
